# Supplementary material for: Do movements contribute to sense of body ownership? Rubber hand illusion in expert pianists
Source: Springer Nature journal article supplement (doi:10.1007/s00426-018-1137-x), 2018-12-17
Supplement: MOESM1 [file 16348704]

## Sheet: Sheet1
Subject N	Group	Years of expertise (for pianists)	Hours/week currently (for pianists)	Static Drift Syn	Static Drift Asyn	Active Drift Syn	Active Drift Asyn	Passive Drift Syn	Passive Drift Asyn	Static OwnQ Syn Real	StaticOwnQSyn Control	StaticOwnQSyn R-C	StaticOwnQAsyn Real	StaticOwnQAsyn Control	StaticOwnQAsyn R-C	ActiveOwnQSyn Real	ActiveOwnQSyn Control	ActiveOwnQSyn R-C	ActiveOwnQAsyn Real	ActiveOwnQAsyn Control	ActiveOwnQAsyn R-C	PassiveOwnQSyn Real	PassiveOwnQSyn Control	PassiveOwnQSyn R-C	PassiveOwnQAsyn Real	PassiveOwnQAsyn Control	PassiveOwnQAsyn R-C	StaticAgQSyn Real	StaticAgQSyn Control	StaticAgQSyn R-C	StaticAgQAsyn Real	StaticAgQAsyn Control	StaticAgQAsyn R-C	ActiveAgQSyn Real	ActiveAgQSyn Control	ActiveAgQSyn R-C	ActiveAgQAsyn Real	ActiveAgQAsyn Control	ActiveAgQAsyn R-C	PassiveAgQSyn Real	PassiveAgQSyn Control	PassiveAgQSyn R-C	PassiveAgQAsyn Real	PassiveAgQAsyn Control	PassiveAgQAsyn R-C
1	Pianists	18	4	0.333333	0.166667	-1.33333	-3	0.5	0.333333	1.33333	-1.66667	3	-2.66667	-2.66667	0	1.33333	-1	2.33333	-2.33333	-2.66667	0.333333	-1	-1.66667	0.666667	-3	-3	0	-1.33333	-2.66667	1.33333	-3	-2.33333	-0.666667	2	-2.33333	4.33333	-2.33333	-0.666667	-1.66667	0.666667	-0.666667	1.33333	-3	-2.33333	-0.666667
2	Pianists	18	6	-3.66667	-0.666667	0	0	-0.666667	-0.166667	2.66667	-3	5.66667	1	-3	4	0.333333	-3	3.33333	0.333333	-1.66667	2	2	-3	5	-1.33333	-3	1.66667	-0.333333	-2.66667	2.33333	-1.66667	-3	1.33333	2.33333	-3	5.33333	-1.66667	-2.66667	1	-3	-3	0	-3	-3	0
3	Pianists	17	6	-3.16667	0.166667	-0.833333	-0.666667	0.666667	-0.166667	2	-3	5	-3	-3	0	-0.666667	-3	2.33333	-2.33333	-3	0.666667	0.333333	-3	3.33333	-1.66667	-3	1.33333	-3	-2.66667	-0.333333	-3	-3	0	3	-2.66667	5.66667	-3	-3	0	-2.66667	-3	0.333333	-2.5	-3	0.5
4	Pianists	12	6	5.33333	-1	3.16667	-1.66667	0.833333	0.166667	3	-2	5	-2	-2.66667	0.666667	2	-2.33333	4.33333	-2.66667	-2	-0.666667	0	-3	3	-2.66667	-2.66667	0	-3	-3	0	-3	-3	0	3	-3	6	-3	-1	-2	-3	0	-3	-3	-1.66667	-1.33333
5	Pianists	5	5	-2	2	-0.833333	0.333333	1.33333	-1	0.333333	-3	3.33333	-3	-2.66667	-0.333333	-2.33333	-3	0.666667	-3	-3	0	-1	-1.66667	0.666667	-2.33333	-2.33333	0	-3	-2.66667	-0.333333	-3	-1.33333	-1.66667	2.33333	-3	5.33333	-1	-3	2	-3	1.33333	-4.33333	-3	-1.33333	-1.66667
6	Pianists	12	10	0.5	-0.666667	0.5	0.5	-0.5	-1	1.66667	-2	3.66667	0.333333	-1.33333	1.66667	-0.666667	-3	2.33333	-3	-3	0	-2.66667	-3	0.333333	-2.33333	-3	0.666667	1.66667	1.66667	0	0.666667	0.333333	0.333333	-0.333333	-1.33333	1	-3	-1	-2	-3	-1	-2	-3	-1	-2
7	Pianists	9	10	0.833333	-0.333333	-1.5	-3	-0.5	-0.5	2.33333	-3	5.33333	-3	-3	0	-2.66667	-3	0.333333	-3	-3	0	-1.33333	-2	0.666667	-3	-3	0	-2.66667	-3	0.333333	-3	-3	0	-2.33333	-3	0.666667	-3	-3	0	-1.33333	-2.66667	1.33333	-3	-3	0
8	Pianists	20	4	1.33333	3	1.83333	0.333333	0.833333	-0.5	0.333333	-2	2.33333	-1	-3	2	-1	-2.66667	1.66667	-3	-3	0	-2	-2	0	-1.66667	-2.33333	0.666667	-2.66667	-2.66667	0	-3	-3	0	3	-3	6	0.333333	-2	2.33333	-3	1.66667	-4.66667	-3	-1.33333	-1.66667
9	Pianists	15	4	-2.5	0.5	-4.83333	1.83333	2.5	-1.16667	0	-0.666667	0.666667	-3	-3	0	-1.66667	-1.33333	-0.333333	-1.66667	-2.33333	0.666667	0	-1.66667	1.66667	-1.66667	-1.66667	0	-3	-2.66667	-0.333333	-3	-3	0	1	-2.33333	3.33333	-0.666667	-2.33333	1.66667	-0.333333	2	-2.33333	-1	-3	2
10	Pianists	5	3	-0.666667	-0.5	-1	0	-0.5	-0.5	-3	-2.66667	-0.333333	-3	-3	0	-2.66667	-2.66667	0	-3	-2.66667	-0.333333	-3	-3	0	-3	-2.66667	-0.333333	-3	-3	0	-3	-3	0	0	-3	3	-3	-1.66667	-1.33333	-2.66667	-3	0.333333	-3	-2	-1
11	Pianists	10	5	-1.5	4.83333	2	-0.666667	-0.166667	0.666667	-1.66667	-3	1.33333	-3	-2.33333	-0.666667	-1.33333	-3	1.66667	-3	-3	0	-3	-3	0	-3	-3	0	-3	-3	0	-3	-3	0	3	-3	6	-3	-1.33333	-1.66667	-3	-3	0	-3	-3	0
12	Pianists	10	42	-0.666667	-0.5	-0.833333	0.5	-0.5	-0.5	-3	-3	0	-3	-3	0	-3	-3	0	-3	-3	0	-3	-3	0	-3	-3	0	-3	-1	-2	-3	-1	-2	2	-3	5	-3	-1	-2	1.33333	-3	4.33333	-3	-1	-2
13	Pianists	20	14	0.333333	0.833333	-1.33333	-2.5	0.5	-1	-2.33333	-3	0.666667	-2.33333	-2.66667	0.333333	-2	-2.66667	0.666667	-2.66667	-2.66667	0	-2	-2.66667	0.666667	-3	-3	0	-3	-3	0	-3	-3	0	3	-3	6	1.66667	-1	2.66667	2.33333	-3	5.33333	0	-3	3
14	Pianists	16	28	-0.666667	-1.33333	1	-0.166667	-0.5	0	-1.33333	-3	1.66667	-3	-3	0	-2	-2.66667	0.666667	-3	-3	0	-2.33333	-3	0.666667	-3	-3	0	-3	-3	0	-3	-3	0	3	-3	6	-3	-1	-2	-3	3	-6	-3	-1	-2
15	Pianists	13	2	3.16667	-1.83333	0.333333	-0.666667	1.33333	-0.666667	-3	-2.66667	-0.333333	-3	-3	0	-3	-2.66667	-0.333333	-3	-3	0	0	-2.66667	2.66667	-3	-3	0	-3	-3	0	-3	-3	0	3	-3	6	-2.33333	-3	0.666667	-2.33333	-1	-1.33333	-3	-2.66667	-0.333333
16	Pianists	20	40	-1.83333	-0.833333	1	0.333333	-1.33333	-1.83333	-2.33333	-2.33333	0	-1.66667	-1.66667	0	-0.666667	-1	0.333333	-2	-1.33333	-0.666667	-1.66667	-1.33333	-0.333333	-2	-2	0	-2	-1.66667	-0.333333	-2.33333	-2.66667	0.333333	2.33333	-1.66667	4	-1.33333	-0.666667	-0.666667	-1.33333	1	-2.33333	-3	-0.333333	-2.66667
17	Pianists	18	14	2.66667	1.5	0.833333	-1.5	-1.33333	-3	-3	-2.66667	-0.333333	-3	-3	0	-3	-2.66667	-0.333333	-2.66667	-2.66667	0	-0.666667	-1	0.333333	-3	-3	0	-3	-3	0	-3	-3	0	0	-3	3	-1.66667	-2.33333	0.666667	-3	-1.66667	-1.33333	-3	-1.66667	-1.33333
18	Pianists	7	14	0.666667	0.166667	-0.5	0.666667	-1	2	-2	-1.66667	-0.333333	-2	-3	1	-3	-3	0	-3	-3	0	-1.33333	-3	1.66667	-3	-3	0	-2	-3	1	-3	-3	0	3	-3	6	-3	-1.33333	-1.66667	3	-2	5	2	-1.33333	3.33333
19	Pianists	8	4	2.16667	-0.833333	0.833333	0.666667	-1.33333	0.166667	-2.33333	-2.66667	0.333333	-2.33333	-2.33333	0	-2.66667	-2.66667	0	-3	-2.33333	-0.666667	-1	-2.66667	1.66667	-1.33333	-3	1.66667	-2.66667	-3	0.333333	-3	-3	0	-2	-2.66667	0.666667	-3	-2.33333	-0.666667	-1.33333	-3	1.66667	-2	-3	1
20	Pianists	16	3	-1.66667	-1.66667	0.666667	-0.5	-0.166667	-1	3	-0.333333	3.33333	-1.66667	-2.33333	0.666667	3	-1	4	-2.66667	-2.66667	0	2.33333	-0.666667	3	-3	-2.33333	-0.666667	-3	-3	0	-3	-2.66667	-0.333333	2	-3	5	-2.33333	-2.66667	0.333333	-1.66667	-2.66667	1	-3	-2.33333	-0.666667
1	Control			2	0	2.33333	2	1	-0.666667	1	0.333333	0.666667	1	0	1	1.33333	0.333333	1	1.33333	0.666667	0.666667	1.33333	0.666667	0.666667	1.33333	1	0.333333	0.666667	0.333333	0.333333	0	-0.333333	0.333333	1	0	1	1.33333	0.666667	0.666667	0.666667	0.333333	0.333333	-0.5	0.666667	-1.16667
2	Control			0.666667	1.66667	2.66667	-0.833333	-1.75	-1.5	1.66667	0.333333	1.33333	1.33333	-2	3.33333	0.333333	0.666667	-0.333333	-2	-0.333333	-1.66667	0	1	-1	-1.66667	-2	0.333333	-2	-1	-1	-0.666667	-2	1.33333	2.66667	0.666667	2	-0.666667	-1.33333	0.666667	1.66667	0.333333	1.33333	-2.5	-2	-0.5
3	Control			4.16667	2.33333	1	0.5	-0.833333	1.5	1	-2	3	0	-2.66667	2.66667	-1	-2.33333	1.33333	-1	-2.66667	1.66667	0.333333	-1.33333	1.66667	-0.333333	-2.66667	2.33333	0.666667	-1.33333	2	0.666667	-2	2.66667	2	-0.666667	2.66667	0.333333	-1.33333	1.66667	2	0.333333	1.66667	2	-2.66667	4.66667
4	Control			1.16667	-0.916667	1.5	-3.75	-0.5	-0.833333	2.66667	-3	5.66667	1.33333	-2.33333	3.66667	-1.33333	-2.66667	1.33333	1	-0.666667	1.66667	1.33333	-2.66667	4	-1	-2.66667	1.66667	1	-2.66667	3.66667	0.333333	-2.66667	3	2	-3	5	-2.66667	-0.333333	-2.33333	-0.666667	-0.333333	-0.333333	-2	-0.333333	-1.66667
5	Control			11.3333	2.66667	5.16667	0.333333	11.1667	-8.33333	3	-0.666667	3.66667	2.33333	1	1.33333	3	1	2	1.66667	-1.33333	3	2.66667	1	1.66667	-3	-1.33333	-1.66667	-3	-3	0	-2	-1.33333	-0.666667	3	-2	5	-3	1	-4	-2.66667	-1.33333	-1.33333	-0.5	1	-1.5
6	Control			3.16667	1.16667	0.666667	-1.66667	-1.33333	-1.33333	2.33333	-0.333333	2.66667	-2.33333	-2.33333	0	1.33333	-0.666667	2	-3	-3	0	1.33333	-2.33333	3.66667	-3	-3	0	-2	-2	0	-3	-2.66667	-0.333333	3	-3	6	-3	-1.33333	-1.66667	-2.33333	0.666667	-3	-3	-2	-1
7	Control			3.83333	2.66667	3.16667	1.33333	4.33333	-0.5	0	-1	1	-3	-3	0	-0.666667	-3	2.33333	-3	-3	0	-2.66667	-2.66667	0	-2.66667	-3	0.333333	-3	-3	0	-3	-3	0	3	-3	6	-3	-1.33333	-1.66667	-3	-1.33333	-1.66667	-2.5	-3	0.5
8	Control			-0.333333	-1.66667	2.83333	-1	-0.833333	-0.166667	2.66667	-1	3.66667	1	0	1	3	-2	5	-1	0	-1	2.33333	0	2.33333	0.666667	-1	1.66667	0.333333	-0.333333	0.666667	-0.333333	-2	1.66667	3	-1.66667	4.66667	-2.33333	-0.666667	-1.66667	-0.333333	2.33333	-2.66667	-2	-0.666667	-1.33333
9	Control			1.66667	-0.333333	4.16667	0.333333	0.5	1.66667	0.333333	-2	2.33333	-3	-3	0	3	-2.66667	5.66667	-2.33333	-2	-0.333333	3	-3	6	-2	-3	1	-3	-3	0	-3	-3	0	3	-3	6	-2.66667	-1.33333	-1.33333	-1.33333	-3	1.66667	-1.5	-1.66667	0.166667
10	Control			7.83333	-1.5	4.83333	3.16667	-1.16667	-1.33333	-0.333333	-1	0.666667	-0.333333	-2	1.66667	-1.33333	-2	0.666667	-2.66667	-3	0.333333	-1	-2.33333	1.33333	-3	-3	0	-2	-2.66667	0.666667	-0.333333	-2	1.66667	-1.33333	-2.66667	1.33333	-3	-3	0	-2.66667	-2.66667	0	-3	-3	0
11	Control			-2.16667	-0.666667	1.5	1	-1.16667	0.5	2.66667	0.666667	2	-2	-3	1	2.66667	1	1.66667	-3	-3	0	-2.66667	-0.333333	-2.33333	-3	-1.66667	-1.33333	0.333333	-3	3.33333	-2	-2.66667	0.666667	3	-2.33333	5.33333	1	-1.66667	2.66667	-3	1.66667	-4.66667	-2.5	1.33333	-3.83333
12	Control			-0.5	1.5	1.66667	-1	-0.333333	-1.16667	1.66667	2.33333	-0.666667	1.33333	2.33333	-1	2	1.66667	0.333333	1.33333	1.33333	0	-1	-0.333333	-0.666667	-1	-0.333333	-0.666667	-1	-1	0	-1	0	-1	3	0	3	1.66667	0.666667	1	3	0	3	0	2	-2
13	Control			0.333333	0.666667	-0.166667	1	0.166667	-1.66667	-3	-3	0	-3	-3	0	-3	-3	0	1	-1.66667	2.66667	-3	-3	0	-3	-3	0	-3	-3	0	-3	-3	0	3	-3	6	-2	-2	0	-3	-2.33333	-0.666667	-3	-3	0
14	Control			0.833333	-1.16667	-0.166667	0.5	1.83333	-0.333333	2	1	1	-3	-2.33333	-0.666667	1.33333	-1	2.33333	-3	-2.66667	-0.333333	1	-1	2	-3	-2.33333	-0.666667	-2.66667	-1	-1.66667	-2.66667	-2.33333	-0.333333	2.66667	-3	5.66667	1.66667	-3	4.66667	-2.33333	1.33333	-3.66667	-2.5	0.666667	-3.16667
15	Control			0	-3.16667	0.5	-1.16667	2.33333	-1.33333	1.33333	-0.333333	1.66667	2.66667	0	2.66667	1	0.666667	0.333333	0.333333	-2	2.33333	-1.33333	-3	1.66667	-1.66667	-3	1.33333	2.66667	0	2.66667	-3	-2	-1	3	-3	6	-2.66667	0.333333	-3	-0.333333	0.666667	-1	-2	-1.33333	-0.666667
16	Control			2	0.666667	2.83333	1.5	2.83333	3	1.66667	1.33333	0.333333	1.33333	0.666667	0.666667	0	1	-1	0	0.666667	-0.666667	-2.66667	-2	-0.666667	0	-0.333333	0.333333	-0.666667	-0.666667	0	-2.33333	-2	-0.333333	3	-2.66667	5.66667	-2	-0.666667	-1.33333	1	-0.666667	1.66667	-1	-1.33333	0.333333
17	Control			3.33333	1	1.33333	1	1.16667	0.166667	2	0.333333	1.66667	-1.33333	-2.33333	1	2.33333	0.666667	1.66667	0.333333	0	0.333333	2.66667	0.333333	2.33333	0.666667	1	-0.333333	-0.333333	-1	0.666667	-3	-3	0	2.66667	-1.33333	4	0.333333	-1	1.33333	3	-2.66667	5.66667	0	-0.666667	0.666667
18	Control			-1.33333	-1.83333	1.16667	0.5	7	0.333333	-3	-3	0	-3	-3	0	-1.66667	-0.333333	-1.33333	-2	-2	0	-1	1	-2	-3	-3	0	-3	-3	0	-3	-3	0	2.33333	-2.66667	5	0.666667	-1.66667	2.33333	-1.66667	2	-3.66667	-3	-3	0
19	Control			5	-2.83333	3.33333	-1.66667	2.83333	0	0.333333	-3	3.33333	-2	-3	1	1.33333	-3	4.33333	-1.66667	-3	1.33333	1	-3	4	-3	-3	0	-3	-3	0	-3	-3	0	2	-3	5	-2.33333	-1.66667	-0.666667	-1.66667	0	-1.66667	-3	-1.33333	-1.66667
20	Control			4.66667	-1.33333	6.5	3	3.33333	1.16667	2	-1.33333	3.33333	-3	-3	0	2.33333	0	2.33333	-3	-3	0	2	0.333333	1.66667	-2	-2	0	-3	-3	0	-3	-3	0	3	-2	5	-3	-1	-2	-0.333333	-3	2.66667	-3	-1	-2
